# Supplementary material for: Resting-state fMRI study of brain activation using low-intensity repetitive transcranial magnetic stimulation in rats
Source: PubMed Central journal article supplement (PMC5928106; doi:10.1038/s41598-018-24951-6), 2018-04-30
Supplement: 41598_2018_24951_MOESM1_ESM.pdf [file 41598_2018_24951_MOESM1_ESM.pdf]

# Resting-state fMRI study of brain activation using low-intensity repetitive transcranial magnetic stimulation in rats

Bhedita J Seewoo<sup>1,2,3</sup>, Kirk W Feindel<sup>2,4</sup>, Sarah J  
Etherington<sup>3</sup>, Jennifer Rodger<sup>1,5\*</sup>

<sup>1</sup> *Experimental and Regenerative Neurosciences, School of Biological Sciences, The University of Western Australia, Perth, WA, Australia*

<sup>2</sup> *Centre for Microscopy, Characterisation and Analysis, Research Infrastructure Centres, The University of Western Australia, Perth, WA, Australia*

<sup>3</sup> *School of Veterinary and Life Sciences, Murdoch University, Perth, WA, Australia*

<sup>4</sup> *School of Biomedical Sciences, The University of Western Australia, Perth, WA, Australia,*

<sup>5</sup> *Brain Plasticity Group, Perron Institute for Neurological and Translational Research, Perth, WA, Australia*

**\* Corresponding author:**

Associate Professor Jennifer Rodger  
Experimental and Regenerative Neurosciences  
School of Biological Sciences M317  
The University of Western Australia,  
35 Stirling Highway, Crawley WA 6009  
Tel: + 61 (0) 8 6488 2245  
Email: [jennifer.rodger@uwa.edu.au](mailto:jennifer.rodger@uwa.edu.au)  
Mobile: 0411 844 103

## Supplementary Table S1

**Supplementary Table 1. Total number of pulses delivered during 10 min LI-rTMS at the different frequencies used.** Adapted from Grehl et al.<sup>26</sup>

| Frequency          | Description                                                           | Total number of pulses delivered |
|--------------------|-----------------------------------------------------------------------|----------------------------------|
| <b>0 Hz (sham)</b> | Coil not activated                                                    | 0                                |
| <b>1 Hz</b>        | 1 pulse per second                                                    | 600                              |
| <b>10 Hz</b>       | 10 pulses per second                                                  | 6,000                            |
| <b>ctBS</b>        | 3 pulses at 50 Hz, repeated at 5 Hz (Cárdenas-Morales et al., 2010)   | 9,000                            |
| <b>BHFS</b>        | 62.6 ms trains of 20 pulses, repeated at 9.75 Hz (Grehl et al., 2015) | 120,000                          |

## Supplementary Figure S1

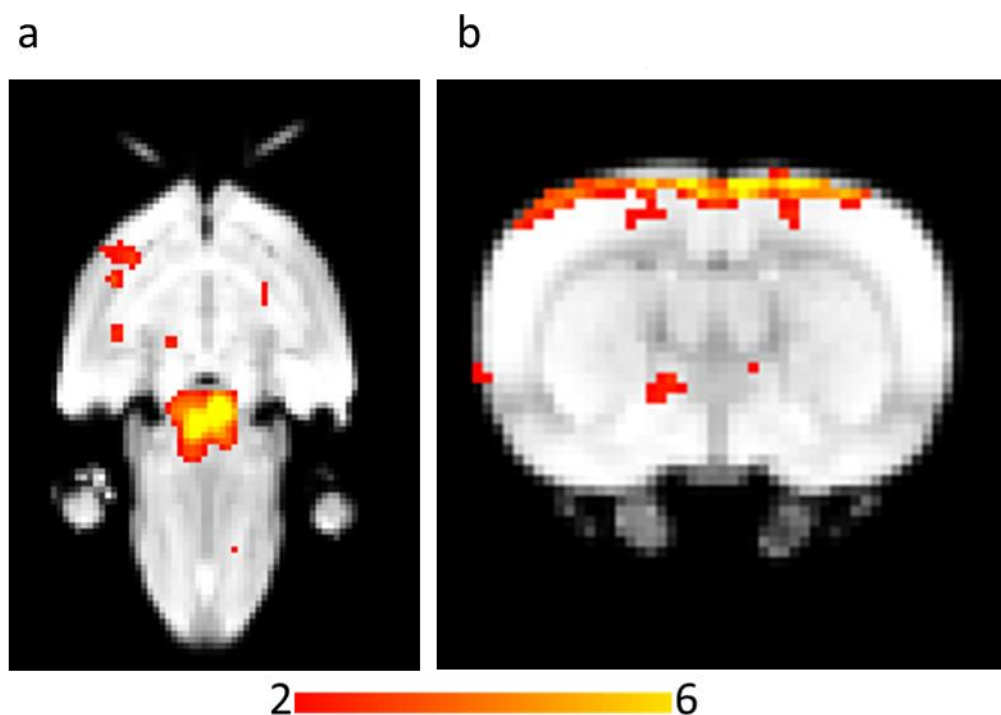

**Supplementary Figure S1. Two independent components — one axial slice (a) and one coronal slice (b) — from group-ICA classified as ‘noise’ components.** A shows highly synchronised resting activity in the brainstem while B shows highly synchronised activity only at the dorsal part of the coronal slice. Colour bar indicates z-scores (thresholded at  $z > 2$ , uncorrected p-value  $< 0.0455$  for a two-tailed hypothesis).

## Supplementary Table S2

**Supplementary Table 2. Summary of changes in the default mode network in brain regions post-rTMS using 10 Hz and BHFS excitatory frequencies and 1 Hz and cTBS inhibitory frequencies on the right (R) side (ipsilateral changes) and on the left (L) side (contralateral changes) of the brain.** The numbers in brackets correspond to the numbers used to denote the different brain regions in Figure 5. '↑' refers to an increase in correlated activity, '↓' refers to a decrease in correlated activity and '-' means no change.

| Region                           | Function                                        | Excitatory frequencies |   |      |   | Inhibitory frequencies |   |      |   |
|----------------------------------|-------------------------------------------------|------------------------|---|------|---|------------------------|---|------|---|
|                                  |                                                 | 10 Hz                  |   | BHFS |   | 1 Hz                   |   | cTBS |   |
|                                  |                                                 | R                      | L | R    | L | R                      | L | R    | L |
| <b>Orbital cortex (1)</b>        | Decision making and emotional processing        | ↑                      | ↑ | -    | - | ↑                      | ↑ | ↑    | - |
| <b>Auditory cortex (3)</b>       | Hearing functions                               | ↓                      | - | ↓    | ↓ | -                      | ↓ | -    | ↓ |
| <b>Somatosensory cortex* (4)</b> | Receives all sensory input                      | ↓                      | - | ↓    | ↓ | ↓                      | ↓ | ↑    | - |
| <b>Striatum (5)</b>              | Facilitates voluntary movement                  | ↓                      | - | ↓    | - | ↓                      | - | ↑    | ↑ |
| <b>Retrosplenial cortex (6)</b>  | Episodic memory and spatial navigation          | ↓                      | - | -    | - | ↓                      | ↓ | -    | - |
| <b>Entorhinal cortex (10)</b>    | Learning and memory                             | ↓                      | - | ↓    | - | -                      | - | -    | - |
| <b>Hippocampus* (11)</b>         | Regulates emotions, spatial learning and memory | ↓                      | - | ↓    | ↓ | ↓                      | ↓ | -    | - |
| <b>Visual cortex (12)</b>        | Receives and processes visual input             | -                      | - | -    | ↓ | -                      | ↓ | -    | - |
| <b>Inferior colliculus (13)</b>  | Part of the auditory system                     | ↓                      | - | ↓    | - | -                      | - | -    | - |
| <b>Motor cortex* (14)</b>        | Motor function and motor planning               | ↓↑                     | ↑ | -    | ↓ | ↑                      | ↓ | ↑    | - |

\*These brain regions are the primary targets of stimulation.
